# Supplementary material for: Developing principles for predicting ionic liquid effects on reaction outcome. The importance of the anion in controlling microscopic interactions
Source: Royal Society of Chemistry journal article supplement (doi:10.1039/c4ob02482f), 2015-01-01
Supplement: c4ob02482f1.pdf [file c4ob02482f1.pdf]

Supporting Information:

**Developing principles for predicting ionic liquid effects on reaction outcome. The importance of the anion in controlling microscopic interactions**

*Sinead T. Keaveney, Ronald S. Haines and Jason B. Harper*

Table of Contents

|                                                                                                                                            |    |
|--------------------------------------------------------------------------------------------------------------------------------------------|----|
| <b><i>p</i>-Methoxybenzaldehyde 1 and hexan-1-amine 2</b> .....                                                                            | 2  |
| Effect of changing the concentration of 2: in acetonitrile and [Bmim][N(CF <sub>3</sub> SO <sub>2</sub> ) <sub>2</sub> ] 5, at 8.1°C ..... | 2  |
| Mole fraction data: [Bmim][N(CF <sub>3</sub> SO <sub>2</sub> ) <sub>2</sub> ] 5, at 8.1°C .....                                            | 4  |
| Mole fraction data: [Bmim][PF <sub>6</sub> ] 6, at 8.1°C .....                                                                             | 5  |
| Mole fraction data: [Bmim][BF <sub>4</sub> ] 7, at 8.1°C .....                                                                             | 6  |
| Mole fraction data: [Bmim][N(CN) <sub>2</sub> ] 8 at 8.1°C .....                                                                           | 7  |
| Mole fraction data: [Bmim][I] 9, at 8.1°C .....                                                                                            | 8  |
| Eyring Data: Acetonitrile .....                                                                                                            | 9  |
| Eyring Data: [Bmim][N(CF <sub>3</sub> SO <sub>2</sub> ) <sub>2</sub> ] 5 .....                                                             | 10 |
| Eyring Data: [Bmim][PF <sub>6</sub> ] 6 .....                                                                                              | 11 |
| Eyring Data: [Bmim][BF <sub>4</sub> ] 7 .....                                                                                              | 12 |
| Eyring Data: [Bmim][N(CN) <sub>2</sub> ] 8 .....                                                                                           | 13 |
| Eyring Data: [Bmim][I] 9 .....                                                                                                             | 14 |
| Eyring Data: [Bmim][Br]/[N(CF <sub>3</sub> SO <sub>2</sub> ) <sub>2</sub> ] .....                                                          | 15 |
| Activation Parameter Summary .....                                                                                                         | 16 |
| Gibbs free energy vs $\beta$ .....                                                                                                         | 16 |

*p*-Methoxybenzaldehyde **1** and hexan-1-amine **2**

| Mole Fraction of <b>5</b> | [Nu] / mol L <sup>-1</sup> | $k_{\text{obs}} / 10^{-4} \text{ s}^{-1}$ | $k_2 / 10^{-4} \text{ L mol}^{-1} \text{ s}^{-1}$ | Average $k_2 / 10^{-4} \text{ L mol}^{-1} \text{ s}^{-1}$ | $k_2$ from graph / $10^{-4} \text{ L mol}^{-1} \text{ s}^{-1}$ |      |
|---------------------------|----------------------------|-------------------------------------------|---------------------------------------------------|-----------------------------------------------------------|----------------------------------------------------------------|------|
| 0                         | 0.153                      | 0.185                                     | 1.21                                              | 1.06 (0.19)                                               | 0.83 (0.08)                                                    |      |
|                           |                            | 0.232                                     | 1.52                                              |                                                           |                                                                |      |
|                           | 0.427                      | 0.473                                     | 1.11                                              |                                                           |                                                                |      |
|                           |                            | 0.468                                     | 1.09                                              |                                                           |                                                                |      |
|                           |                            | 0.386                                     | 0.90                                              |                                                           |                                                                |      |
|                           |                            | 0.590                                     | 1.14                                              |                                                           |                                                                |      |
|                           | 0.590                      | 0.672                                     | 0.88                                              |                                                           |                                                                |      |
|                           |                            | 0.521                                     | 1.03                                              |                                                           |                                                                |      |
|                           |                            | 0.607                                     | 1.03                                              |                                                           |                                                                |      |
|                           |                            | 0.817                                     | 0.88                                              |                                                           |                                                                |      |
| 0.722                     |                            | 0.88                                      |                                                   |                                                           |                                                                |      |
| 0.694                     |                            | 0.85                                      |                                                   |                                                           |                                                                |      |
| 0.9                       | 0.292                      | 1.862                                     | 6.38                                              | 6.83 (0.51)                                               | 6.37 (0.46)                                                    |      |
|                           |                            | 1.916                                     | 6.56                                              |                                                           |                                                                |      |
|                           |                            | 2.121                                     | 7.26                                              |                                                           |                                                                |      |
|                           | 0.149                      | 1.169                                     | 7.83                                              |                                                           |                                                                |      |
|                           |                            | 1.078                                     | 7.22                                              |                                                           |                                                                |      |
|                           |                            | 2.864                                     | 6.88                                              |                                                           |                                                                |      |
|                           | 0.416                      | 2.941                                     | 7.07                                              |                                                           |                                                                |      |
|                           |                            | 2.931                                     | 7.04                                              |                                                           |                                                                |      |
|                           |                            | 0.358                                     | 2.282                                             |                                                           |                                                                | 6.37 |
|                           |                            | 2.259                                     | 6.31                                              |                                                           |                                                                |      |
|                           |                            | 2.232                                     | 6.23                                              |                                                           |                                                                |      |

Effect of changing the concentration of **2**: in acetonitrile and [Bmim][N(CF<sub>3</sub>SO<sub>2</sub>)<sub>2</sub>] **5**, at 8.1°C

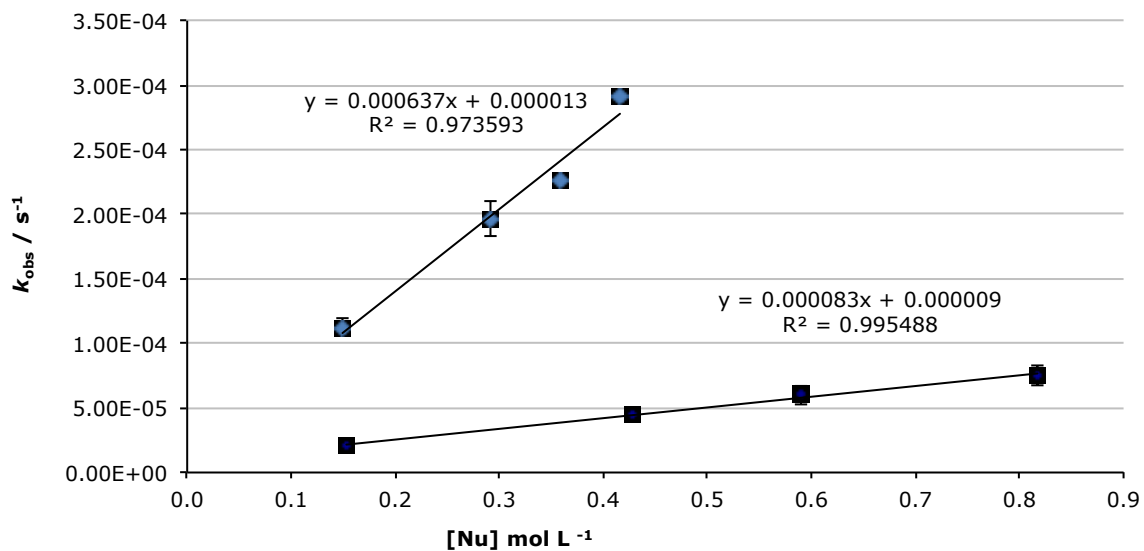

**Fig. S1** The observed rate constants for the reaction between benzaldehyde **1** and the amine **2** at different concentrations of the nucleophile **2** in either acetonitrile (black) or [Bmim][N(CF<sub>3</sub>SO<sub>2</sub>)<sub>2</sub>] (blue) at 8.1°C.

When changing the concentration of the nucleophile **2** there is a linear change in the observed rate constant, and the slope of the graph of the rate constant vs nucleophile concentration corresponds to the bimolecular rate constant as expected. This shows that the rate of the reaction is dependent on the nucleophile, consistent with the initial addition step being rate-determining.

Mole fraction data: [Bmim][N(CF<sub>3</sub>SO<sub>2</sub>)<sub>2</sub>] **5**, at 8.1°C

| <b>Mole Fraction<br/>of 5</b> | <b>[Nu] / mol L<sup>-1</sup></b> | <b><i>k</i><sub>obs</sub> / 10<sup>-4</sup> s<sup>-1</sup></b> | <b><i>k</i><sub>2</sub> / 10<sup>-4</sup> L mol<sup>-1</sup> s<sup>-1</sup></b> | <b>Average <i>k</i><sub>2</sub><br/>/ 10<sup>-4</sup> L mol<sup>-1</sup> s<sup>-1</sup></b> |
|-------------------------------|----------------------------------|----------------------------------------------------------------|---------------------------------------------------------------------------------|---------------------------------------------------------------------------------------------|
| 0                             | 0.153                            | 0.185                                                          | 1.21                                                                            | 1.31 (0.20)                                                                                 |
|                               | 0.196                            | 0.303                                                          | 1.54                                                                            |                                                                                             |
| 0.11                          | 0.177                            | 0.232                                                          | 1.18                                                                            | 3.31 (0.21)                                                                                 |
|                               |                                  | 0.609                                                          | 3.44                                                                            |                                                                                             |
|                               |                                  | 0.544                                                          | 3.07                                                                            |                                                                                             |
| 0.21                          | 0.151                            | 0.608                                                          | 3.43                                                                            | 4.87 (0.15)                                                                                 |
|                               |                                  | 0.742                                                          | 4.91                                                                            |                                                                                             |
|                               |                                  | 0.712                                                          | 4.71                                                                            |                                                                                             |
| 0.32                          | 0.155                            | 0.756                                                          | 5.00                                                                            | 5.85 (0.03)                                                                                 |
|                               |                                  | 0.912                                                          | 5.88                                                                            |                                                                                             |
|                               |                                  | 0.909                                                          | 5.86                                                                            |                                                                                             |
| 0.41                          | 0.159                            | 0.904                                                          | 5.82                                                                            | 6.63 (0.03)                                                                                 |
|                               |                                  | 1.052                                                          | 6.61                                                                            |                                                                                             |
|                               |                                  | 1.051                                                          | 6.60                                                                            |                                                                                             |
| 0.51                          | 0.176                            | 1.061                                                          | 6.67                                                                            | 6.28 (0.07)                                                                                 |
|                               |                                  | 1.101                                                          | 6.24                                                                            |                                                                                             |
|                               |                                  | 1.100                                                          | 6.24                                                                            |                                                                                             |
| 0.62                          | 0.148                            | 1.122                                                          | 6.36                                                                            | 6.91 (0.28)                                                                                 |
|                               |                                  | 0.979                                                          | 6.63                                                                            |                                                                                             |
|                               |                                  | 1.018                                                          | 6.89                                                                            |                                                                                             |
| 0.70                          | 0.154                            | 1.063                                                          | 7.20                                                                            | 6.93 (0.04)                                                                                 |
|                               |                                  | 1.074                                                          | 6.96                                                                            |                                                                                             |
|                               |                                  | 1.062                                                          | 6.89                                                                            |                                                                                             |
| 0.80                          | 0.156                            | 1.071                                                          | 6.95                                                                            | 7.87 (0.45)                                                                                 |
|                               |                                  | 1.183                                                          | 7.58                                                                            |                                                                                             |
|                               |                                  | 1.311                                                          | 8.40                                                                            |                                                                                             |
| 0.91                          | 0.145                            | 1.194                                                          | 7.65                                                                            | 8.12 (0.36)                                                                                 |
|                               |                                  | 1.223                                                          | 8.45                                                                            |                                                                                             |
|                               |                                  | 1.120                                                          | 7.74                                                                            |                                                                                             |
|                               |                                  | 1.184                                                          | 8.18                                                                            |                                                                                             |

Mole fraction data: [Bmim][PF<sub>6</sub>] **6**, at 8.1°C

| Mole Fraction<br>of <b>6</b> | [Nu] / mol L <sup>-1</sup> | $k_{\text{obs}} / 10^{-4} \text{ s}^{-1}$ | $k_2 / 10^{-4} \text{ L mol}^{-1} \text{ s}^{-1}$ | Average $k_2$<br>/ $10^{-4} \text{ L mol}^{-1} \text{ s}^{-1}$ |
|------------------------------|----------------------------|-------------------------------------------|---------------------------------------------------|----------------------------------------------------------------|
| 0                            | 0.153                      | 0.185                                     | 1.21                                              | 1.31 (0.20)                                                    |
|                              | 0.196                      | 0.303                                     | 1.54                                              |                                                                |
| 0.15                         | 0.379                      | 0.232                                     | 1.18                                              | 2.00 (0.14)                                                    |
|                              |                            | 0.723                                     | 1.91                                              |                                                                |
|                              |                            | 0.818                                     | 2.15                                              |                                                                |
| 0.21                         | 0.499                      | 0.734                                     | 1.94                                              | 1.64 (0.10)                                                    |
|                              |                            | 0.764                                     | 1.53                                              |                                                                |
|                              |                            | 0.852                                     | 1.71                                              |                                                                |
| 0.34                         | 0.399                      | 0.842                                     | 1.69                                              | 1.74 (0.10)                                                    |
|                              |                            | 0.738                                     | 1.85                                              |                                                                |
|                              |                            | 0.678                                     | 1.70                                              |                                                                |
| 0.40                         | 0.252                      | 0.666                                     | 1.67                                              | 1.97 (0.09)                                                    |
|                              |                            | 0.487                                     | 1.94                                              |                                                                |
|                              |                            | 0.522                                     | 2.08                                              |                                                                |
| 0.51                         | 0.279                      | 0.480                                     | 1.91                                              | 2.07 (0.04)                                                    |
|                              |                            | 0.565                                     | 2.02                                              |                                                                |
|                              |                            | 0.581                                     | 2.08                                              |                                                                |
| 0.60                         | 0.364                      | 0.584                                     | 2.09                                              | 1.62 (0.03)                                                    |
|                              |                            | 0.588                                     | 1.62                                              |                                                                |
|                              |                            | 0.578                                     | 1.59                                              |                                                                |
| 0.70                         | 0.395                      | 0.597                                     | 1.64                                              | 1.64 (0.09)                                                    |
|                              |                            | 0.644                                     | 1.63                                              |                                                                |
|                              |                            | 0.612                                     | 1.55                                              |                                                                |
| 0.81                         | 0.407                      | 0.684                                     | 1.73                                              | 1.99 (0.08)                                                    |
|                              |                            | 0.774                                     | 1.90                                              |                                                                |
|                              |                            | 0.831                                     | 2.04                                              |                                                                |
| 0.91                         | 0.399                      | 0.829                                     | 2.04                                              | 1.78 (0.10)                                                    |
|                              |                            | 0.720                                     | 1.81                                              |                                                                |
|                              |                            | 0.669                                     | 1.68                                              |                                                                |
|                              |                            | 0.746                                     | 1.87                                              |                                                                |

Mole fraction data: [Bmim][BF<sub>4</sub>] 7, at 8.1°C

| Mole Fraction<br>of 7 | [Nu] / mol L <sup>-1</sup> | $k_{\text{obs}} / 10^{-4} \text{ s}^{-1}$ | $k_2 / 10^{-4} \text{ L mol}^{-1} \text{ s}^{-1}$ | Average $k_2$<br>/ $10^{-4} \text{ L mol}^{-1} \text{ s}^{-1}$ |
|-----------------------|----------------------------|-------------------------------------------|---------------------------------------------------|----------------------------------------------------------------|
| 0                     | 0.153                      | 0.185                                     | 1.21                                              | 1.31 (0.20)                                                    |
|                       | 0.196                      | 0.303                                     | 1.54                                              |                                                                |
| 0.11                  | 0.247                      | 0.232                                     | 1.18                                              | 3.76 (0.11)                                                    |
|                       |                            | 0.953                                     | 3.86                                              |                                                                |
|                       |                            | 0.899                                     | 3.64                                              |                                                                |
| 0.23                  | 0.231                      | 0.935                                     | 3.78                                              | 5.60 (0.07)                                                    |
|                       |                            | 1.276                                     | 5.52                                              |                                                                |
|                       |                            | 1.309                                     | 5.66                                              |                                                                |
| 0.30                  | 0.347                      | 1.298                                     | 5.61                                              | 4.95 (0.05)                                                    |
|                       |                            | 1.735                                     | 5.00                                              |                                                                |
|                       |                            | 1.702                                     | 4.91                                              |                                                                |
| 0.40                  | 0.360                      | 1.719                                     | 4.96                                              | 6.37 (0.16)                                                    |
|                       |                            | 2.360                                     | 6.55                                              |                                                                |
|                       |                            | 2.263                                     | 6.28                                              |                                                                |
| 0.52                  | 0.299                      | 2.258                                     | 6.27                                              | 7.49 (0.11)                                                    |
|                       |                            | 2.280                                     | 7.61                                              |                                                                |
|                       |                            | 2.217                                     | 7.40                                              |                                                                |
| 0.61                  | 0.308                      | 2.228                                     | 7.44                                              | 8.04 (0.17)                                                    |
|                       |                            | 2.418                                     | 7.84                                              |                                                                |
|                       |                            | 2.522                                     | 8.18                                              |                                                                |
| 0.70                  | 0.274                      | 2.494                                     | 8.09                                              | 7.95 (0.19)                                                    |
|                       |                            | 2.168                                     | 7.92                                              |                                                                |
|                       |                            | 2.235                                     | 8.16                                              |                                                                |
| 0.83                  | 0.329                      | 2.131                                     | 7.78                                              | 7.94 (0.04)                                                    |
|                       |                            | 2.603                                     | 7.91                                              |                                                                |
|                       |                            | 2.621                                     | 7.96                                              |                                                                |
| 0.93                  | 0.332                      | 2.920                                     | 8.80                                              | 8.83 (0.60)                                                    |
|                       |                            | 2.674                                     | 8.06                                              |                                                                |
|                       |                            | 2.978                                     | 8.98                                              |                                                                |
|                       |                            | 3.152                                     | 9.50                                              |                                                                |

Mole fraction data: [Bmim][N(CN)<sub>2</sub>] **8** at 8.1°C

| <b>Mole Fraction<br/>of <b>8</b></b> | <b>[Nu] / mol L<sup>-1</sup></b> | <b><i>k</i><sub>obs</sub> / 10<sup>-4</sup> s<sup>-1</sup></b> | <b><i>k</i><sub>2</sub> / 10<sup>-4</sup> L mol<sup>-1</sup> s<sup>-1</sup></b> | <b>Average <i>k</i><sub>2</sub><br/>/ 10<sup>-4</sup> L mol<sup>-1</sup> s<sup>-1</sup></b> |
|--------------------------------------|----------------------------------|----------------------------------------------------------------|---------------------------------------------------------------------------------|---------------------------------------------------------------------------------------------|
| 0                                    | 0.153                            | 0.185                                                          | 1.21                                                                            | 1.31 (0.20)                                                                                 |
|                                      | 0.196                            | 0.303                                                          | 1.54                                                                            |                                                                                             |
| 0.10                                 | 0.338                            | 0.232                                                          | 1.18                                                                            | 2.46 (0.17)                                                                                 |
|                                      |                                  | 0.843                                                          | 2.49                                                                            |                                                                                             |
|                                      |                                  | 0.883                                                          | 2.61                                                                            |                                                                                             |
| 0.22                                 | 0.269                            | 0.807                                                          | 3.00                                                                            | 3.13 (0.12)                                                                                 |
|                                      |                                  | 0.873                                                          | 3.25                                                                            |                                                                                             |
|                                      |                                  | 0.842                                                          | 3.13                                                                            |                                                                                             |
| 0.30                                 | 0.310                            | 1.137                                                          | 3.67                                                                            | 3.72 (0.18)                                                                                 |
|                                      |                                  | 1.216                                                          | 3.92                                                                            |                                                                                             |
|                                      |                                  | 1.107                                                          | 3.57                                                                            |                                                                                             |
| 0.41                                 | 0.296                            | 1.327                                                          | 4.48                                                                            | 4.46 (0.03)                                                                                 |
|                                      |                                  | 1.329                                                          | 4.48                                                                            |                                                                                             |
|                                      |                                  | 1.314                                                          | 4.43                                                                            |                                                                                             |
| 0.51                                 | 0.316                            | 1.634                                                          | 5.17                                                                            | 4.79 (0.42)                                                                                 |
|                                      |                                  | 1.538                                                          | 4.86                                                                            |                                                                                             |
|                                      |                                  | 1.369                                                          | 4.33                                                                            |                                                                                             |
| 0.60                                 | 0.329                            | 1.586                                                          | 4.83                                                                            | 4.73 (0.14)                                                                                 |
|                                      |                                  | 1.578                                                          | 4.80                                                                            |                                                                                             |
|                                      |                                  | 1.501                                                          | 4.57                                                                            |                                                                                             |
| 0.71                                 | 0.297                            | 1.752                                                          | 5.89                                                                            | 5.46 (0.42)                                                                                 |
|                                      |                                  | 1.620                                                          | 5.45                                                                            |                                                                                             |
|                                      |                                  | 1.504                                                          | 5.05                                                                            |                                                                                             |
| 0.84                                 | 0.292                            | 1.679                                                          | 5.76                                                                            | 5.52 (0.21)                                                                                 |
|                                      |                                  | 1.573                                                          | 5.40                                                                            |                                                                                             |
|                                      |                                  | 1.573                                                          | 5.40                                                                            |                                                                                             |
| 0.93                                 | 0.285                            | 1.473                                                          | 5.17                                                                            | 5.42 (0.23)                                                                                 |
|                                      |                                  | 1.565                                                          | 5.49                                                                            |                                                                                             |
|                                      |                                  | 1.598                                                          | 5.61                                                                            |                                                                                             |



Mole fraction data: [Bmim][I] **9**, at 8.1°C

| Mole Fraction of <b>8</b> | [Nu] / mol L <sup>-1</sup> | $k_{\text{obs}} / 10^{-4} \text{ s}^{-1}$ | $k_2 / 10^{-4} \text{ L mol}^{-1} \text{ s}^{-1}$ | Average $k_2 / 10^{-4} \text{ L mol}^{-1} \text{ s}^{-1}$ |
|---------------------------|----------------------------|-------------------------------------------|---------------------------------------------------|-----------------------------------------------------------|
| 0                         | 0.153                      | 0.18                                      | 1.2                                               | 1.3 (0.2)                                                 |
|                           | 0.196                      | 0.30                                      | 1.5                                               |                                                           |
|                           |                            | 0.23                                      | 1.2                                               |                                                           |
| 0.11                      | 0.189                      | 11.33                                     | 59.9                                              | 61.5 (2.8)                                                |
|                           |                            | 11.36                                     | 60.0                                              |                                                           |
|                           |                            | 12.25                                     | 64.8                                              |                                                           |
| 0.23                      | 0.253                      | 41.11                                     | 162.5                                             | 172.3 (8.7)                                               |
|                           |                            | 45.37                                     | 179.4                                             |                                                           |
|                           |                            | 44.26                                     | 175.0                                             |                                                           |
| 0.33                      | 0.194                      | 23.07                                     | 119.1                                             | 118.5 (1.1)                                               |
|                           |                            | 23.09                                     | 119.2                                             |                                                           |
|                           |                            | 22.72                                     | 117.3                                             |                                                           |
|                           |                            | 88.84                                     | 431.8                                             |                                                           |
| 0.70                      | 0.206                      | 88.84                                     | 431.8                                             | 432 (43)*                                                 |

- As only one replicate was able to be used, error is assumed to be 10%

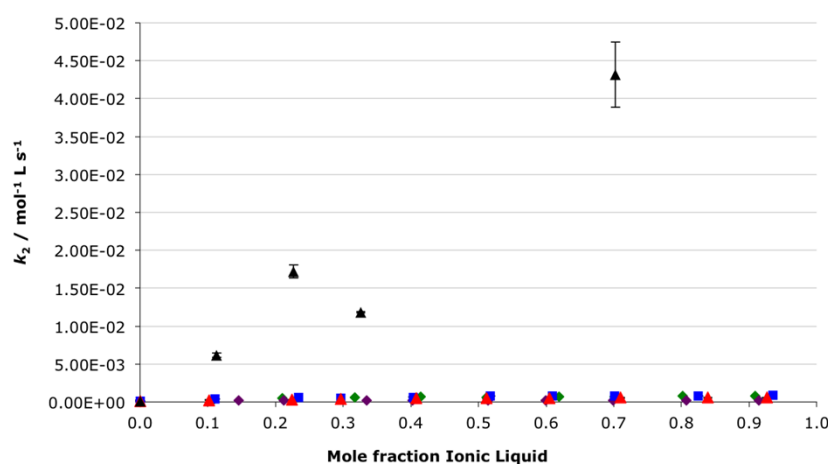

**Fig. S2** The bimolecular rate constants for the reaction between benzaldehyde **1** and the amine **2** in different mole fractions of [Bmim][I] **9** (□) in acetonitrile, at 282 K. Uncertainties are reported as the standard deviation of three replicates, except for  $\chi_{\text{IL}} 0.7$  which represents one data point, and the error was estimated as  $\pm 10\%$ . [Bmim][N(CF<sub>3</sub>SO<sub>2</sub>)<sub>2</sub>] **5** (◆), [Bmim][PF<sub>6</sub>] **6** (◆), [Bmim][BF<sub>4</sub>] **7** (■) and [Bmim][N(CN)<sub>2</sub>] **8** (■) in acetonitrile are included for perspective.

## Eyring Data: Acetonitrile

| Temperature / °C | [Nu] / mol L <sup>-1</sup> | $k_{\text{obs}}$<br>/ 10 <sup>-3</sup> s <sup>-1</sup> | $k_2$<br>/ 10 <sup>-3</sup> L mol <sup>-1</sup> s <sup>-1</sup> |
|------------------|----------------------------|--------------------------------------------------------|-----------------------------------------------------------------|
| 8.1              | 0.196                      | 0.0303                                                 | 0.154                                                           |
|                  |                            | 0.0232                                                 | 0.118                                                           |
| 63.6             | 0.153                      | 0.0185                                                 | 0.121                                                           |
|                  |                            | 0.0708                                                 | 0.463                                                           |
|                  |                            | 0.0744                                                 | 0.486                                                           |
|                  |                            | 0.0831                                                 | 0.543                                                           |
| 47.8             |                            | 0.0574                                                 | 0.375                                                           |
|                  |                            | 0.0493                                                 | 0.322                                                           |
|                  |                            | 0.0552                                                 | 0.361                                                           |
| 36.6             |                            | 0.0349                                                 | 0.228                                                           |
|                  |                            | 0.0461                                                 | 0.301                                                           |
|                  |                            | 0.0388                                                 | 0.254                                                           |
| 54.0             |                            | 0.0644                                                 | 0.421                                                           |
|                  |                            | 0.0672                                                 | 0.439                                                           |
|                  |                            | 0.0621                                                 | 0.406                                                           |

Eyring Data: [Bmim][N(CF<sub>3</sub>SO<sub>2</sub>)<sub>2</sub>] **5**

| Mole Fraction<br>of 4 | Temperature /<br>°C | [Nu] / mol L <sup>-1</sup> | $k_{\text{obs}}$<br>/ 10 <sup>-3</sup> s <sup>-1</sup> | $k_2$<br>/ 10 <sup>-3</sup> L mol <sup>-1</sup> s <sup>-1</sup> |
|-----------------------|---------------------|----------------------------|--------------------------------------------------------|-----------------------------------------------------------------|
| 0.22                  | 20.3                | 0.200                      | 0.185                                                  | 0.92                                                            |
|                       |                     |                            | 0.164                                                  | 0.82                                                            |
|                       |                     |                            | 0.196                                                  | 0.98                                                            |
|                       | 28.7                |                            | 0.286                                                  | 1.43                                                            |
|                       |                     |                            | 0.281                                                  | 1.40                                                            |
|                       |                     |                            | 0.285                                                  | 1.42                                                            |
|                       | 8.1                 |                            | 0.079                                                  | 0.40                                                            |
|                       |                     |                            | 0.080                                                  | 0.40                                                            |
|                       |                     |                            | 0.082                                                  | 0.41                                                            |
|                       | 42.7                |                            | 0.600                                                  | 3.00                                                            |
|                       |                     |                            | 0.553                                                  | 2.76                                                            |
|                       |                     |                            | 0.584                                                  | 2.92                                                            |
|                       |                     |                            | 0.584                                                  | 2.92                                                            |
|                       | 0.93                |                            | 29.4                                                   | 0.237                                                           |
| 0.543                 |                     | 2.29                       |                                                        |                                                                 |
| 0.536                 |                     | 2.26                       |                                                        |                                                                 |
| 36.6                  |                     | 0.930                      | 3.93                                                   |                                                                 |
|                       |                     | 0.932                      | 3.94                                                   |                                                                 |
|                       |                     | 0.858                      | 3.62                                                   |                                                                 |
| 44.3                  |                     | 1.131                      | 4.78                                                   |                                                                 |
|                       |                     | 1.275                      | 5.39                                                   |                                                                 |
|                       |                     | 1.264                      | 5.34                                                   |                                                                 |
| 19.3                  |                     | 0.333                      | 1.41                                                   |                                                                 |
|                       |                     | 0.316                      | 1.33                                                   |                                                                 |
|                       |                     | 0.329                      | 1.39                                                   |                                                                 |

Eyring Data: [Bmim][PF<sub>6</sub>] **6**

| Mole Fraction<br>of 5 | Temperature /<br>°C | [Nu] / mol L <sup>-1</sup> | $k_{\text{obs}}$<br>/ 10 <sup>-3</sup> s <sup>-1</sup> | $k_2$<br>/ 10 <sup>-3</sup> L mol <sup>-1</sup> s <sup>-1</sup> |       |      |
|-----------------------|---------------------|----------------------------|--------------------------------------------------------|-----------------------------------------------------------------|-------|------|
| 0.21                  | 41.8                | 0.499                      | 0.665                                                  | 1.33                                                            |       |      |
|                       |                     |                            | 0.585                                                  | 1.17                                                            |       |      |
|                       |                     |                            | 0.503                                                  | 1.01                                                            |       |      |
|                       | 31                  |                            | 0.293                                                  | 0.59                                                            |       |      |
|                       |                     |                            | 0.290                                                  | 0.58                                                            |       |      |
|                       |                     |                            | 0.327                                                  | 0.66                                                            |       |      |
|                       | 20.1                |                            | 0.177                                                  | 0.36                                                            |       |      |
|                       |                     |                            | 0.191                                                  | 0.38                                                            |       |      |
|                       |                     |                            | 0.180                                                  | 0.36                                                            |       |      |
|                       | 8.1                 |                            | 0.076                                                  | 0.15                                                            |       |      |
|                       |                     |                            | 0.085                                                  | 0.17                                                            |       |      |
|                       |                     |                            | 0.084                                                  | 0.17                                                            |       |      |
|                       |                     |                            | 0.91                                                   | 18.9                                                            | 0.134 | 0.34 |
|                       |                     |                            |                                                        |                                                                 | 0.146 | 0.37 |
| 0.141                 | 0.35                |                            |                                                        |                                                                 |       |      |
| 29.0                  | 0.266               | 0.67                       |                                                        |                                                                 |       |      |
|                       | 0.281               | 0.70                       |                                                        |                                                                 |       |      |
|                       | 0.256               | 0.64                       |                                                        |                                                                 |       |      |
| 8.1                   | 0.072               | 0.18                       |                                                        |                                                                 |       |      |
|                       | 0.067               | 0.17                       |                                                        |                                                                 |       |      |
|                       | 0.075               | 0.19                       |                                                        |                                                                 |       |      |
|                       | 36.3                | 0.389                      |                                                        | 0.97                                                            |       |      |
| 0.365                 |                     | 0.91                       |                                                        |                                                                 |       |      |
| 0.340                 |                     | 0.85                       |                                                        |                                                                 |       |      |

Eyring Data: [Bmim][BF<sub>4</sub>] 7

| Mole Fraction<br>of 6 | Temperature /<br>°C | [Nu] / mol L <sup>-1</sup> | $k_{\text{obs}}$<br>/ 10 <sup>-3</sup> s <sup>-1</sup> | $k_2$<br>/ 10 <sup>-3</sup> L mol <sup>-1</sup> s <sup>-1</sup> |       |      |
|-----------------------|---------------------|----------------------------|--------------------------------------------------------|-----------------------------------------------------------------|-------|------|
| 0.23                  | 19.2                | 0.231                      | 0.238                                                  | 1.03                                                            |       |      |
|                       |                     |                            | 0.260                                                  | 1.13                                                            |       |      |
|                       | 0.261               |                            | 1.13                                                   |                                                                 |       |      |
|                       | 27.8                |                            | 0.372                                                  | 1.61                                                            |       |      |
|                       |                     |                            | 0.384                                                  | 1.66                                                            |       |      |
|                       |                     |                            | 0.375                                                  | 1.62                                                            |       |      |
|                       | 8.1                 |                            | 0.128                                                  | 0.55                                                            |       |      |
|                       |                     |                            | 0.131                                                  | 0.57                                                            |       |      |
|                       |                     |                            | 0.130                                                  | 0.56                                                            |       |      |
|                       | 36.8                |                            | 0.585                                                  | 2.53                                                            |       |      |
|                       |                     |                            | 0.634                                                  | 2.74                                                            |       |      |
|                       |                     |                            | 0.623                                                  | 2.69                                                            |       |      |
|                       |                     |                            | 0.93                                                   | 27.7                                                            | 0.714 | 2.15 |
|                       |                     |                            |                                                        |                                                                 | 0.770 | 2.32 |
| 20.8                  |                     | 0.733                      |                                                        | 2.21                                                            |       |      |
|                       | 0.574               | 1.73                       |                                                        |                                                                 |       |      |
|                       | 0.564               | 1.70                       |                                                        |                                                                 |       |      |
| 14.2                  | 0.597               | 1.80                       |                                                        |                                                                 |       |      |
|                       | 0.354               | 1.07                       |                                                        |                                                                 |       |      |
|                       | 0.384               | 1.16                       |                                                        |                                                                 |       |      |
|                       | 0.375               | 1.13                       |                                                        |                                                                 |       |      |
|                       | 8.1                 | 0.292                      | 0.88                                                   |                                                                 |       |      |
| 0.267                 |                     | 0.81                       |                                                        |                                                                 |       |      |
| 0.298                 |                     | 0.90                       |                                                        |                                                                 |       |      |
| 0.315                 |                     | 0.95                       |                                                        |                                                                 |       |      |

Eyring Data: [Bmim][N(CN)<sub>2</sub>] **8**

| Mole Fraction<br>of 7 | Temperature /<br>°C | [Nu] / mol L <sup>-1</sup> | <i>k</i> <sub>obs</sub><br>/ 10 <sup>-3</sup> s <sup>-1</sup> | <i>k</i> <sub>2</sub><br>/ 10 <sup>-3</sup> L mol <sup>-1</sup> s <sup>-1</sup> |
|-----------------------|---------------------|----------------------------|---------------------------------------------------------------|---------------------------------------------------------------------------------|
| 0.22                  | 18.9                | 0.269                      | 0.141                                                         | 0.52                                                                            |
|                       |                     |                            | 0.144                                                         | 0.54                                                                            |
|                       |                     |                            | 0.148                                                         | 0.55                                                                            |
|                       | 29.8                |                            | 0.234                                                         | 0.87                                                                            |
|                       |                     |                            | 0.240                                                         | 0.89                                                                            |
|                       |                     |                            | 0.254                                                         | 0.95                                                                            |
|                       | 40.1                |                            | 0.343                                                         | 1.28                                                                            |
|                       |                     |                            | 0.339                                                         | 1.26                                                                            |
|                       |                     |                            | 0.332                                                         | 1.24                                                                            |
|                       | 8.1                 |                            | 0.081                                                         | 0.30                                                                            |
|                       |                     |                            | 0.087                                                         | 0.33                                                                            |
|                       |                     |                            | 0.084                                                         | 0.31                                                                            |
|                       |                     |                            |                                                               |                                                                                 |
| 0.93                  | 23.5                | 0.285                      | 0.262                                                         | 0.92                                                                            |
|                       |                     |                            | 0.282                                                         | 0.99                                                                            |
|                       |                     |                            | 0.267                                                         | 0.94                                                                            |
|                       | 15.7                |                            | 0.199                                                         | 0.70                                                                            |
|                       |                     |                            | 0.215                                                         | 0.76                                                                            |
|                       |                     |                            | 0.345                                                         | 1.21                                                                            |
|                       | 29.9                |                            | 0.373                                                         | 1.31                                                                            |
|                       |                     |                            | 0.362                                                         | 1.27                                                                            |
|                       |                     |                            | 0.147                                                         | 0.52                                                                            |
|                       | 8.1                 |                            | 0.157                                                         | 0.55                                                                            |
|                       |                     |                            | 0.160                                                         | 0.56                                                                            |
|                       |                     |                            |                                                               |                                                                                 |

Eyring Data: [Bmim][I] 9

| Mole Fraction<br>of 8 | Temperature /<br>°C | [Nu] / mol L <sup>-1</sup> | $k_{\text{obs}}$<br>/ 10 <sup>-3</sup> s <sup>-1</sup> | $k_2$<br>/ 10 <sup>-3</sup> L mol <sup>-1</sup> s <sup>-1</sup> |
|-----------------------|---------------------|----------------------------|--------------------------------------------------------|-----------------------------------------------------------------|
| 0.23                  | 0.6                 | 0.253                      | 2.912                                                  | 11.51                                                           |
|                       |                     |                            | 2.923                                                  | 11.56                                                           |
|                       |                     |                            | 2.723                                                  | 10.77                                                           |
|                       | 8.1                 |                            | 4.111                                                  | 16.25                                                           |
|                       |                     |                            | 4.537                                                  | 17.94                                                           |
|                       |                     |                            | 4.426                                                  | 17.50                                                           |
|                       | -6.3                |                            | 2.296                                                  | 9.08                                                            |
|                       |                     |                            | 2.261                                                  | 8.94                                                            |
|                       |                     |                            | 2.305                                                  | 9.11                                                            |
|                       | -12                 |                            | 1.810                                                  | 7.16                                                            |
|                       |                     |                            | 1.790                                                  | 7.08                                                            |
|                       |                     |                            | 1.809                                                  | 7.15                                                            |

Eyring Data: [Bmim][Br]/[N(CF<sub>3</sub>SO<sub>2</sub>)<sub>2</sub>]

| Mole Fraction<br>of 9 in 4 | Temperature /<br>°C | [Nu] / mol L <sup>-1</sup> | $k_{\text{obs}}$<br>/ 10 <sup>-3</sup> s <sup>-1</sup> | $k_2$<br>/ 10 <sup>-3</sup> L mol <sup>-1</sup> s <sup>-1</sup> |
|----------------------------|---------------------|----------------------------|--------------------------------------------------------|-----------------------------------------------------------------|
| 0.32/0.60                  | 30.1                | 0.285                      | 0.597                                                  | 2.09                                                            |
|                            |                     |                            | 0.506                                                  | 1.78                                                            |
|                            |                     |                            | 0.553                                                  | 1.94                                                            |
|                            | 22.1                |                            | 0.410                                                  | 1.44                                                            |
|                            |                     |                            | 0.381                                                  | 1.34                                                            |
|                            |                     |                            | 0.392                                                  | 1.38                                                            |
|                            | 35.4                |                            | 0.605                                                  | 2.12                                                            |
|                            |                     |                            | 0.541                                                  | 1.90                                                            |
|                            |                     |                            | 0.551                                                  | 1.93                                                            |
|                            | 40.8                |                            | 0.633                                                  | 2.22                                                            |
|                            |                     |                            | 0.627                                                  | 2.20                                                            |
|                            |                     |                            | 0.656                                                  | 2.30                                                            |



## Activation Parameter Summary

| Solvent                                                            | Mole Fraction | $\Delta H^\ddagger$ / kJ mol <sup>-1</sup> | $\Delta S^\ddagger$ / J K <sup>-1</sup> mol <sup>-1</sup> |
|--------------------------------------------------------------------|---------------|--------------------------------------------|-----------------------------------------------------------|
| Acetonitrile                                                       | -             | 14.2 (1.0)                                 | -333.1 (3.3)                                              |
| [Bmim][N(CF <sub>3</sub> SO <sub>2</sub> ) <sub>2</sub> ] <b>5</b> | 0.22          | 37.0 (0.9)                                 | -242.1 (3.1)                                              |
|                                                                    | 0.93          | 36.8 (1.5)                                 | -238.5 (5.0)                                              |
| [Bmim][PF <sub>6</sub> ] <b>6</b>                                  | 0.21          | 37.1 (1.5)                                 | -249.4 (5.1)                                              |
|                                                                    | 0.91          | 37.7 (1.2)                                 | -246.5 (4.1)                                              |
| [Bmim][BF <sub>4</sub> ] <b>7</b>                                  | 0.24          | 34.0 (0.8)                                 | -250.3 (2.6)                                              |
|                                                                    | 0.93          | 29.7 (1.7)                                 | -262.1 (5.8)                                              |
| [Bmim][N(CN) <sub>2</sub> ] <b>8</b>                               | 0.22          | 27.3 (0.9)                                 | -278.6 (2.9)                                              |
|                                                                    | 0.93          | 22.2 (1.1)                                 | -292.6 (3.7)                                              |
| [Bmim][I] <b>9</b>                                                 | 0.23          | 21.6 (1.3)                                 | -266.3 (4.9)                                              |
| [Bmim][Br]/[N(CF <sub>3</sub> SO <sub>2</sub> ) <sub>2</sub> ]     | 0.32/0.60     | 14.1 (2.4)                                 | -316.4 (7.8)                                              |

## Gibbs free energy vs $\beta$

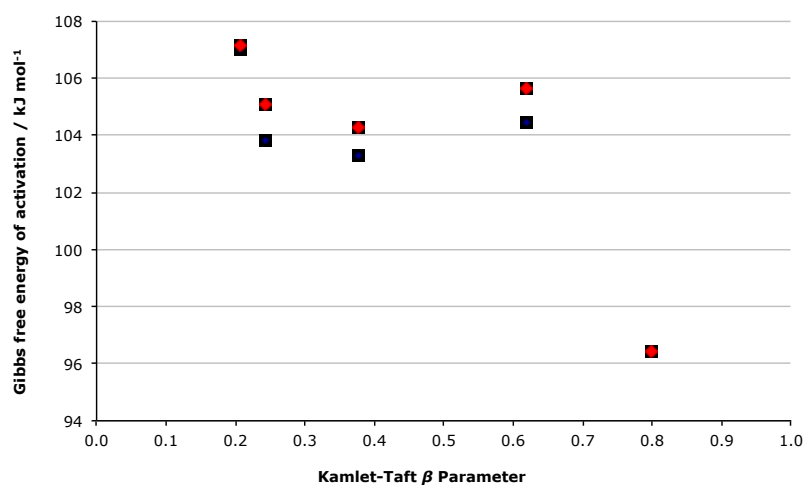

**Fig. S3** The relationship between the Gibbs free energy of activation at 281K and the Kamlet-Taft  $\beta$  parameter for the ionic liquids **5-9** (Table 1) at a mole fraction of 0.2 (◆) and 0.9 (◆). The linear correlations were poor (having an  $R^2$  value of 0.624 and 0.141, respectively) so the trendlines are not included in the figure.
